# Supplementary material
Source: publisher figshare collection journal article supplement (https://future-science-group.figshare.com/articles/dataset/_/23552007)
Supplement: Supplementary file 1 [file 1]

Table 1. Primers for qRT-PCR

| **Gene** | **Forward primer（5'-3'）** | **Reverse primer（5'-3'）** |
| --- | --- | --- |
| mmu-NFAT2 | CTTGAGACAGCCAGACCCAG | CGAGCCAGGTATCTTCGGTC |
| mmu-F2RL2 | CAACATCGTGACCCTGTGGA | ATGCCACACATGAGCATGGA |
| mmu-miR-125b-5p | TGTGAGTCGTATCCAGTGCAA | GTATCCAGTGCGTGTCGTGG |
| hsa-NFAT2 | TTCGAGTTTAACCAGCGCGA | GGAGTGGGATCTCCAGGACT |
| hsa-F2RL2 | TGCTGCTGACACATGGAACT | TGACCTGAGTCCCGTCTCTT |
| hsa-miR-125b-5p | TCCCTGAGACCCTAACTTGTGA | TGTCGTGGAGTCGGCAATTG |
| U6 | CTCGCTTCGGCAGCACA | AACGCTTCACGAATTTGCGT |
| GAPDH | TGTGGGCATCAATGGATTTGG | ACACCATGTATTCCGGGTCAAT |

Table 2. ELISA kits used in the research

| **Inflammatory Factors** | **Response Species** | **Purchase Information** |
| --- | --- | --- |
| IL-1β | mouse | ab100705, Abcam, UK |
| IL-6 | mouse | JL20268, Shanghai Jianglai industrial Limited By Share Ltd |
| human | SBJ-H0465, Nanjing SenBeiJia Biological Technology Co., Ltd. |
| IL-8 | mouse | ml058632, Shanghai Enzyme-linked Biotechnology Co., Ltd. |
| TNF-α | mouse | JL10484, Shanghai Jianglai industrial Limited By Share Ltd |
| human | JL10208, Shanghai Jianglai industrial Limited By Share Ltd |
| VEGF | mouse | ml002076, Shanghai Enzyme-linked Biotechnology Co., Ltd. |
| ICAM-1 | human | ml023955, Shanghai Enzyme-linked Biotechnology Co., Ltd. |

Table 3. Antibody use information

| Antibody | Dilution ratio | Molecular weight | Purchase information |
| --- | --- | --- | --- |
| Bcl-2 | 1:1000 | 26 kDa | ab32124, Abcam, UK |
| Bax | 1:2000 | 21 kDa | ab32503, Abcam, UK |
| cleaved Caspase-3 | 1:500 | 17 kDa | ab32042, Abcam, UK |
| Ki67 | 1:1000 | 358 kDa | ab16667, Abcam, UK |
| GAPDH | 1:5000 | 36 kDa | ab8245, Abcam, UK |
| Goat Anti-Rabbit antibody | 1:5000 | — | ab6721, Abcam, UK |
| Goat Anti-Mouse antibody | 1:5000 | — | ab205719, Abcam, UK |
